# Supplementary material
Source: ML conference proceedings conference paper supplement (https://openreview.net/forum?id=cAPMmCl2f3)
Supplement: supplementary_material [file attachment]

---

# Fair, Polylog-Approximate Low-Cost Hierarchical Clustering

---

Anonymous Author(s)

Affiliation

Address

email

## Abstract

1 Research in fair machine learning, and particularly clustering, has been crucial in  
2 recent years given the many ethical controversies that modern intelligent systems  
3 have posed. Ahmadian et al. [2020] established the study of fairness in *hierarchical*  
4 clustering, a stronger, more structured variant of its well-known flat counterpart,  
5 though their proposed algorithm that optimizes for Dasgupta’s [2016] famous  
6 cost function was highly theoretical. Knittel et al. [2023] then proposed the  
7 first practical fair approximation for cost, however they were unable to break  
8 the polynomial-approximate barrier they posed as a hurdle of interest. We break  
9 this barrier, proposing the first truly polylogarithmic-approximate low-cost fair  
10 hierarchical clustering, thus greatly bridging the gap between the best fair and  
11 vanilla hierarchical clustering approximations.

## 12 1 Introduction

13 Clustering is a pervasive machine learning technique which has filled a vital niche in every day  
14 computer systems. Extending upon this, a *hierarchical clustering* is a recursively defined clustering  
15 where each cluster is partitioned into two or more clusters, and so on. This adds structure to flat  
16 clustering, giving an algorithm the ability to depict data similarity at different resolutions as well as  
17 an ancestral relationship between data points, as in the phylogenetic tree Kraskov et al. [2003].

18 On top of computational biology, hierarchical clustering has found various uses across computer  
19 imaging [Chen et al., 2021b, Selvan et al., 2005], computer security [Chen et al., 2020, 2021a], natural  
20 language processing [Ramanath et al., 2013], and much more. Moreover, it can be applied to any  
21 flat clustering problem where the number of desired clusters is not given. Specifically, a hierarchical  
22 clustering can be viewed as a structure of clusterings at different resolutions that all agree with each  
23 other (i.e., two points clustered together in a higher resolution clustering will also be together in a  
24 lower resolution clustering). Generally, hierarchical clustering techniques are quite impactful on  
25 modern technology, and it is important to guarantee they are both effective and unharmed.

26 Researchers have recognized the harmful biases unchecked machine learning programs pose. A  
27 few examples depicting racial discrimination include allocation of health care [Ledford, 2019],  
28 presentation of ads suggestive of arrest records [Sweeney, 2013], prediction of hiring success [Bogen  
29 and Rieke, 2018], and estimation of recidivism risk [Angwin et al., 2016]. A popular solution that  
30 has been extensively studied in the past decade is *fair machine learning*. Here, fairness concerns  
31 the mitigation of bias, particularly against protected classes. Most often, fairness is an additional  
32 constraint on the allowed solution space; we optimize for problems in light of this constraint. For  
33 instance, the notion of *individual fairness* introduced by the foundational work of Dwork et al. [2012]  
34 deems that an output must guarantee that any two individuals who are similar are classified similarly.

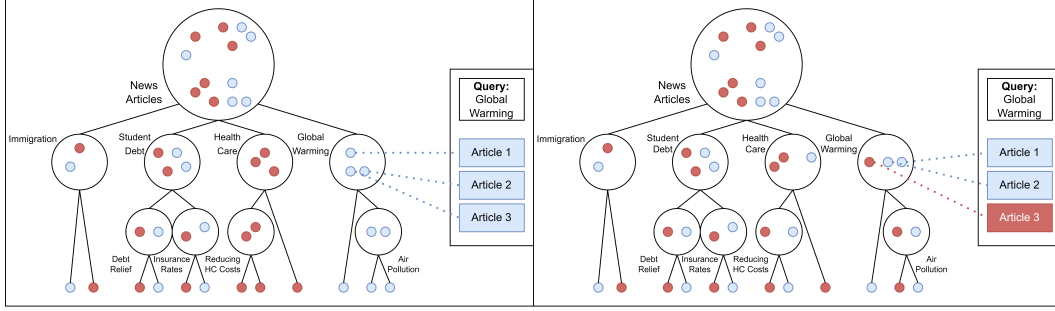

Figure 1: A hierarchical clustering of news articles. Red articles are conservative, blue are liberal. On the left is the optimal unfair hierarchy. We alter the hierarchy slightly on the right to achieve fairness. Now, the user’s query for global warming will yield both liberal and conservative articles.

In line with previous work in clustering and hierarchical clustering, this paper utilizes the notion of *group fairness*, which enforces that different protected classes receive a proportionally similar distribution of classifications (in our case, cluster placement). Chierichetti et al. [2017] first introduced this as a constraint for the flat clustering problem, arguing that it mitigates a system’s disparate impact, or non-proportional impact on different demographics. This notion of fair clustering has been similarly leveraged and extended by a vast range of works in both flat [Ahmadian et al., 2019, Bera et al., 2019, Bercea et al., 2019] and hierarchical [Ahmadian et al., 2020, Knittel et al., 2023] clustering.

To illustrate our fairness concept, consider the following application (Figure 1): a news database is structured as a hierarchical clustering of search terms, where a search term is associated with a cluster of news articles to output to the reader, and more specific search terms access finer-resolution clusters. When a user searches for a term, we simply identify the corresponding cluster and output the contained articles. However, as is, the system does not account for the political skew of articles. In Figure 1, we label conservative-leaning articles in red and liberal-leaning articles in blue. We can see that in this example, when the user searches for global warming articles, they will only see liberal articles. To resolve this, we add a group fairness constraint on our cluster: for example, require at least 1/3 of the articles in each cluster to be of each political skew. This guarantees (as depicted on the right) that the outputted articles will always be at least 1/3 liberal and 1/3 conservative, thus guaranteeing the user is exposed to a range of perspectives along this political axis. This notion of fairness, which we formally define in Definition 3, has been explored in the context of hierarchical clustering in both Ahmadian et al. [2020] and Knittel et al. [2023].

This paper is concerned with approximations for fair low-cost (i.e., optimizing for Dasgupta [2016]’s famous cost metric) hierarchical clustering. This is perhaps the most natural and well-motivated metric for hierarchical clustering evaluation, however it is quite difficult to optimize for (the best being  $O(\sqrt{\log n})$ -approximations [Charikar and Chatziafratis, 2017, Dasgupta, 2016]; it hypothesized to not be  $O(1)$ -approximable [Charikar and Chatziafratis, 2017]). This appears to be even more difficult in the hierarchical clustering literature. The first work to attempt this problem, Ahmadian et al. [2020], achieved a highly impractical  $O(n^{5/6} \log^{3/2} n)$ -approximation (not too far from the trivial  $O(n)$  upper bound), posing fair low-cost hierarchical clustering as a in interesting and inherently difficult problem. Knittel et al. [2023] greatly improved this to a near-polylog approximation factor of  $O(n^\delta \text{polylog}(n))$ , where  $\delta$  can be arbitrarily close to 0, and parameterizes a trade-off between approximation factor and degree of fairness. Still, a true polylog approximation was left as an open problem, one which we solve in this paper.

## 1.1 Our Contributions

This work proposes the first polylogarithmic approximation for fair, low-cost hierarchical clustering. We leverage the work of Knittel et al. [2023] as a starting inspiration and create something much simpler, more direct, and better in both fairness and approximation. Like their algorithm, our algorithm starts with a low-cost unfair hierarchical clustering and then alters it with multiple well-defined and limited tree operators. This gives it a degree of explainability, in that the user can understand exactly the steps the algorithm took to achieve its result and why. In addition, our algorithm achieves both relative cluster balance (i.e., clusters who are children of the same cluster have similar size) and fairness, along with a parameterizeable trade-off between the two.

On top of the benefits of Knittel et al. [2023]’s techniques, we propose a greatly simplified algorithm. They initially proposed an algorithm that required four tree operators, however, we only require two of the four, and we greatly simplify the more complicated operator. This makes the algorithm simpler to understand and more implementable. We show that even with this reduced functionality, we can cleverly achieve both a better approximation and degree of fairness:

**Theorem 1.** *When  $T$  is a  $\gamma$ -approximate low-cost vanilla hierarchical clustering over  $\ell(V) = c_\ell n = O(n)$  vertices of each color  $\ell \in [\lambda]$ , MakeFair (Algorithm 2), for any constants  $\epsilon, h, k$  with  $h \gg k^\lambda$  and  $n \gg h$ , runs in  $O(n \log n (h + \lambda \log n))$  time and yields a hierarchy  $T'$  satisfying:*

1.  $T'$  is an  $O\left(\frac{(h-1)}{\epsilon} + \frac{1+\epsilon}{1-\epsilon} k^\lambda\right)$ -approximation for cost.
2.  $T'$  is fair for any parameters for all  $i \in [\lambda]$ :  $\alpha_i \leq \frac{\lambda_i}{n} \left(\frac{1-\epsilon}{(1+\epsilon)^2} \left(1 - \frac{k(1+\epsilon)}{c_i h}\right)\right)^{O(\log(n))}$  and  $\beta_i \geq \frac{\lambda_i}{n} \left(\frac{1+\epsilon}{(1-\epsilon)^2} \left(1 + \frac{1-\epsilon}{c_i k}\right)\right)^{O(\log(n))}$ , where  $\lambda_i = c_i n$ .
3. All internal nodes in  $T'$  are  $\epsilon$ -relatively balanced.

To put this in perspective, previously, the best approximation for fair hierarchical clustering previously was  $O(n^\delta \text{polylog}(n))$ , whereas the best unfair approximation is  $O(\sqrt{\log n})$ . Our work greatly reduces this gap by providing a true  $O(\text{polylog}(n))$  approximation. This can be achieved by setting  $k = O(1)$ ,  $h = O(\log n)$ , and  $\epsilon = O(1/\log n)$  (note we assume  $\lambda = O(1)$  and the best current  $\gamma = O(\sqrt{\log n})$ ):

**Corollary 1.** *There is a hierarchical clustering algorithm which runs in  $O(n \log^2 n)$  time and yields a hierarchy  $T'$  satisfying: 1)  $T'$  is an  $O(\log^2(n))$ -approximation for cost, 2)  $T'$  is fair for any parameters for all  $i \in [\lambda]$ :  $\alpha_i = a_i \frac{\lambda_i}{n}$  and  $\beta_i \geq b_i \frac{\lambda_i}{n}$  where  $a_i \in (0, 1)$  and  $b_i > 1$  are constants for all  $i \in [\lambda]$ , and 3) All internal nodes in  $T'$  are  $O\left(\frac{1}{\log n}\right)$ -relatively balanced.*

## 2 Preliminaries

### 2.1 The Vanilla Problem

Fair clustering literature refers to the original problem variant, without fairness, as the “vanilla” problem. We define the vanilla problem of finding a low-cost hierarchical clustering here using our specific notation.

In this problem, we are given a complete graph  $G = (V, E, w)$  with a weight function  $w : E \rightarrow \mathbb{R}^+$  is a measure of the similarity between datapoints. Note the data is encoded as a complete tree because we require knowledge of all point-point relationships. We must construct a hierarchical clustering, represented by its dendrogram,  $T$ , with root denoted  $\text{root}(T)$ .  $T$  is a tree with vertices corresponding to all clusters of the hierarchical clustering. Leaves of  $T$ , denoted  $\text{leaves}(\text{root}(T))$  correspond to the points in the dataset (i.e., singleton clusters). An internal node  $v$  corresponds to the cluster containing all leaf-data of the maximal subtree (i.e., contains all its descendants) rooted at  $v$ ,  $T[v]$ . In addition, we let  $u \wedge v$  denote the lowest common ancestor of  $u$  and  $v$  in  $T$ .

In order to define Dasgupta [2016]’s cost function, we use the same notational simplifications as Knittel et al. [2023]. For an edge  $e = (x, y) \in E$ , we say  $n_T(e) = |\text{leaves}(T[x \wedge y])|$  is the size of the smallest cluster in the hierarchy containing  $e$ . Similarly, for a hierarchy node  $v$ ,  $n_T(v_i) = |\text{leaves}(T[v_i])|$  is the size of the corresponding cluster. This is sufficient to introduce the notion of *cost*.

**Definition 1** (Knittel et al. [2023]). *The **cost** of  $e \in E$  in a graph  $G = (V, E, w)$  in a hierarchy  $T$  is  $\text{cost}_T(e) = w(e) \cdot n_T(e)$ .*

Dasgupta’s cost function can then be written as a sum over the costs of all edges.

**Definition 2** (Dasgupta [2016]). *The **cost** of a hierarchy  $T$  on graph  $G = (V, E, w)$  is:*

$$\text{cost}(T) = \sum_{e \in E} \text{cost}_T(e)$$

Our algorithm begins by assuming we have some approximate vanilla hierarchy,  $T$ . That is, if  $OPT$  is the optimal hierarchy tree, then  $\text{cost}(T) \leq \alpha \cdot \text{cost}(OPT)$  for some approximation factor  $\alpha$ . According to Dasgupta [2016], we can transform this hierarchy to be binary without increasing cost. Our paper simply assumes our input is binary. We then produce a modified hierarchy  $T'$  which similar structure to  $T$  that guarantees fairness, i.e.,  $\text{cost}(T') \leq \alpha' \cdot \text{cost}(OPT)$  for some approximation factor  $\alpha' \geq \alpha$ . Note this comparison is being made to the vanilla  $OPT$ , as we are unsure, at this time, how to classify the optimal fair hierarchy. Note that the binary assumption may not hold when we consider adding a fairness constraint.

## 2.2 Fairness and Balance Constraints

We consider the fairness constraints based off those introduced by Chierichetti et al. [2017] and extended by Bercea et al. [2019]. On a graph  $G$  with colored vertices, let  $\ell(C)$  count the number of  $\ell$ -colored points in cluster  $C$ .

**Definition 3** (Knittel et al. [2023]). *Consider a graph  $G = (V, E, w)$  with vertices colored one of  $\lambda$  colors, and two vectors of parameters  $\alpha, \beta \in (0, 1)^\lambda$  with  $\alpha_\ell \leq \beta_\ell$  for all  $\ell \in [\lambda]$ . A hierarchy  $T$  on  $G$  is **fair** if for any non-singleton cluster  $C$  in  $T$  and for every  $\ell \in [\lambda]$ ,  $\alpha_\ell |C| \leq \ell(C) \leq \beta_\ell |C|$ . Additionally, any cluster with a leaf child has only leaf children.*

Effectively, we are given bounds  $\alpha_\ell$  and  $\beta_\ell$  for each color  $\ell$ . Every non-singleton cluster must have at least an  $\alpha_\ell$  fraction and at most a  $\beta_\ell$  fraction of color  $\ell$ . This guarantees proportional representational fairness of each color in each cluster.

As an intermediate step in achieving fairness, we will create splits in our hierarchy that achieve relative balance in terms of subcluster size. Thus, the following definition will come in handy.

**Definition 4.** *In a hierarchy, a vertex  $v$  (corresponding to cluster  $C$ ) with  $c_v$  children is  **$\epsilon$ -relatively balanced** if for every cluster  $\{C_i\}_{i \in [c_v]}$  that corresponds to a child of  $v$ ,  $(\frac{1}{c_v} - \epsilon)|C| \leq |C_i| \leq (\frac{1}{c_v} + \epsilon)|C|$ .*

While this definition is quite similar to that from Knittel et al. [2023], it deviates in two ways: 1) we only define it on a single split as opposed to the entire hierarchy and 2) we allow splits to be non-binary. If we apply it to the entire hierarchy and constrain it to be binary, it is equivalent to the former definition.

## 2.3 Tree Operators

Our work simplifies the work of Knittel et al. [2023]. In doing so, we follow the same framework, using tree operators to make well-defined and limited alterations to a given hierarchical clustering (Figure 2). In addition, our algorithm simplifies operator use in two ways: 1) we only utilize two of their four tree operators, and 2) we greatly simplified their most complicated operator and show that it can still be used to create a fair hierarchy.

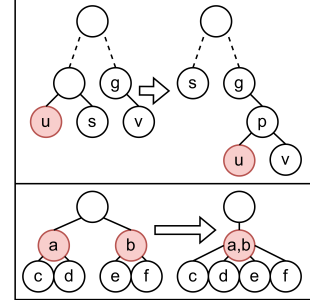

Figure 2: Our operators: subtree deletion and insertion and shallow tree folding.

First off, we utilize the same subtree deletion and insertion operator. The main difference is how we use it, which will be discussed in Section 3. At a high level, this operator removes a subtree from one part of the hierarchy and reinserts it elsewhere, adding and removing parent vertices as necessary.

**Definition 5** (Knittel et al. [2023]). *Consider a binary tree  $T$  with internal nodes  $u$ , some non-ancestor  $v$ ,  $u$ 's sibling  $s$ , and  $v$ 's parent  $g$ . **Subtree deletion** at  $u$  removes  $T[u]$  from  $T$  and contracts  $s$  into its parent. **Subtree insertion** of  $T[u]$  at  $v$  inserts a new parent  $p$  between  $v$  and  $g$  and adds  $u$  as a second child of  $p$ . The operator  $\text{del\_ins}(u, v)$  deletes  $u$  and inserts  $T[u]$  at  $v$ .*

The other operator we leverage is their tree folding operator, however we greatly simplify it. In the previous work, tree folding took two or more isomorphic trees and mapped the internal nodes to each other. Instead, we simply take two or more subtrees and merge their roots. The new root then directly splits into all children of the roots of all folded trees. In a way, this is an implementation of their folding operator but only at a single vertex in the tree topology. This is why we call it a shallow tree fold.

169 **Definition 6.** Consider a set of subtrees  $T_1, \dots, T_k$  of  $T$  such that all  $\text{root}(T_i)$  have the same parent  
 170  $p$  in  $T$ . A **shallow tree folding** of trees  $T_1, \dots, T_k$  ( $\text{shallow\_fold}(T_1, \dots, T_k)$ ) modifies  $T$  such that  
 171 all  $T_1, \dots, T_k$  are replaced by a single tree  $T_f$  whose  $\text{root}(T)$  is made a child of  $p$ , and  $T_1, \dots, T_k$   
 172 make up the direct descendants of  $\text{root}(T_f)$ .

173 In addition, we assume the subtree  $T_f$  is then arbitrarily binarized [Dasgupta, 2016] after folding.  
 174 Since our algorithm works top-bottom, creating balanced vertices as it goes, we don't yet care about  
 175 the fairness of the descendants of  $T_f$ . Moreover, we will then recursively call our algorithm on  $T_f$  to  
 176 do precisely this.

### 177 3 Main Algorithm

178 In this section, we present our fair, low-cost, hierarchical clustering algorithm along with its analysis.  
 179 Ultimately, we achieve the following (for a more intuitive explanation, see Section 1):

180 **Theorem 1.** When  $T$  is a  $\gamma$ -approximate low-cost vanilla hierarchical clustering over  $\ell(V) = c_\ell n =$   
 181  $O(n)$  vertices of each color  $\ell \in [\lambda]$ , MakeFair (Algorithm 2), for any constants  $\epsilon, h, k$  with  $h \gg k^\lambda$   
 182 and  $n \gg h$ , runs in  $O(n \log n (h + \lambda \log n))$  time and yields a hierarchy  $T'$  satisfying:

- 183 1.  $T'$  is an  $O\left(\frac{(h-1)}{\epsilon} + \frac{1+\epsilon}{1-\epsilon} k^\lambda\right)$ -approximation for cost.
- 184 2.  $T'$  is fair for any parameters for all  $i \in [\lambda]$ :  $\alpha_i \leq \frac{\lambda_i}{n} \left(\frac{1-\epsilon}{(1+\epsilon)^2} \left(1 - \frac{k(1+\epsilon)}{c_i h}\right)\right)^{O(\log(n))}$  and  
 185  $\beta_i \geq \frac{\lambda_i}{n} \left(\frac{1+\epsilon}{(1-\epsilon)^2} \left(1 + \frac{1-\epsilon}{c_i k}\right)\right)^{O(\log(n))}$ , where  $\lambda_i = c_i n$ .
- 186 3. All internal nodes in  $T'$  are  $\epsilon$ -relatively balanced.

187 The main idea of our algorithm is to leverage similar tree operators to that of Knittel et al. [2023],  
 188 but greatly simplify their usage and apply them in a more direct, careful manner. Specifically, the  
 189 previous work processes the tree four times: once to achieve 1/6-relative balance everywhere, next  
 190 to achieve  $\epsilon$ -relative balance, next to remove the bottom of the hierarchy, and finally to achieve  
 191 fairness. The problem is that this causes proportional cost increases to grow in an exponential manner,  
 192 particularly because the relative balance significantly degrades as you descend the hierarchy. Our  
 193 solution is to instead do a single top to bottom pass of the tree, rebalancing and folding to achieve  
 194 fairness as we go. We describe this in detail now.

195 First, we assume our input is some given hierarchical clustering tree. Ideally, this will be a good  
 196 approximation for the vanilla problem, but our results do work as a black box on top of any hierarchical  
 197 clustering algorithm. Second, we apply SplitRoot in order to balance the root (Section 3.1). And  
 198 finally, we apply shallow tree folding on the children of the root to achieve fairness (Section 3.2).  
 199 This gives us the first layer of our output, and then we recurse.

#### 200 3.1 Root Splitting and Balancing

201 SplitRoot is depicted in Algorithm 1. This fills the role of Knittel et al. [2023]'s Refine Rebalance  
 202 Tree algorithm (and skips their Rebalance Tree algorithm), but it functions differently in that it only  
 203 rebalances the root and it immediately splits the root into  $h$  children, according to our input parameter  
 204  $h$ .

205 We start SplitRoot by adding dummy children to  $v$  until it has  $h$  children (recall we can assume  
 206 the input is binary). A dummy or null child is just a placeholder for a child to be constructed, or  
 207 alternatively simply a zero-sized tree (note: this does not add any leaves to the tree). None of these  
 208 children will be left empty in the end. Next, we define  $v_{\max}$  and  $v_{\min}$ , the maximal subtrees rooted  
 209 at  $\text{children}(\text{root}(T'))$  which have the most and fewest leaves, respectively.

210 As long as the root is not  $\epsilon$ -relatively balanced (which is equivalent to  $n_{T'}(v_{\max})$  or  $n_{T'}(v_{\min})$   
 211 deviating from the target  $n/h$  by over  $n\epsilon$ , as they are extreme points), we will attempt to rebalance.  
 212 We define  $\delta_1$  and  $\delta_2$  to be the proportional deviation of  $n_{T'}(v_{\min})$  and  $n_{T'}(v_{\max})$  from the target  
 213 size  $n/h$  respectively, and  $\delta$  to be the minimum of the two. In effect,  $\delta$  measures the maximum  
 214 number of leaves we can move from the large subtree to the small subtree without causing  $n_{T'}(v_{\max})$

215 to dip below  $n/h$  or  $n_{T'}(v_{min})$  to peak above  $n/h$ . This is important to guarantee our runtime: as  
 216 an accounting scheme, we show that clusters monotonically approach size  $n/h$ , and thus we can  
 217 quantify how fast our algorithm completes. We fully analyze this later, in Lemma 2.

---

**Algorithm 1** SplitRoot

---

**Input:** A binary hierarchy tree  $T$  of size  $n \geq 1/2\epsilon$  over a graph  $G = (V, E, w)$ , with smaller cluster  
 always on the left, and parameters  $h \in [n]$  and  $\epsilon \in (0, \min(1/6, 1/h))$ .

**Output:** A hierarchical clustering  $T'$  with an  $\epsilon$ -relatively balanced root that has  $k$  children.

```

1: Initialize  $T' = T$ 
2:  $v = \text{root}(T')$ 
3: Add null children to  $v$  until it has  $h$  children
4: Let  $v_{min} = \text{argmin}_{v' \in \text{children}(v)} n_{T'}(v')$ 
5: Let  $v_{max} = \text{argmax}_{v' \in \text{children}(v)} n_{T'}(v')$ 
6: while  $n_{T'}(v_{max}) > n(1/h + \epsilon)$  or  $n_{T'}(v_{min}) < n(1/h - \epsilon)$  do
7:    $\delta_1 = 1/h - n_{T'}(v_{min})/n$ 
8:    $\delta_2 = n_{T'}(v_{max})/n - 1/h$ 
9:    $\delta = \min(\delta_1, \delta_2)$ 
10:  Let  $v = v_{max}$ 
11:
12:  while  $n_{T'}(v) > \delta n$  do
13:     $v \leftarrow \text{right}_{T'}(v)$ 
14:  end while
15:
16:   $u \leftarrow v_{min}$ 
17:  while  $n_{T'}(\text{right}_{T'}(u)) \geq n_{T'}(v)$  do
18:     $u \leftarrow \text{left}_{T'}(u)$ 
19:  end while
20:   $T' \leftarrow T'.\text{del\_ins}(u, v)$ 
21:  Reset  $v_{min}$  and  $v_{max}$ 
22: end while
```

---

218 Now we must attempt exactly this: move a large subtree from  $v_{max}$  to  $v_{min}$ , though this subtree can  
 219 have no more than  $\delta n$  leaves. To do this, we simply start at  $v_{max}$  and traverse down its right children  
 220 (recall below  $v_{max}$ , the tree is still binary). We halt on the first child that is of size  $\delta n$  or smaller. We  
 221 then remove it and find a place to reinsert it under  $v_{min}$ .

222 The insertion spot is found similarly by descending down  $v_{min}$ 's left children until the right child  
 223 of the current vertex has fewer leaves in its subtree than the tree we are inserting. Thus we have  
 224 completed our insertion/deletion operation. We repeat until the tree is relatively balanced, as desired.

225 We now analyze this part of the algorithm. The full proofs can be found in the appendix, but we give  
 226 intuition here. To start, consider the tree we are deleting and reinserting,  $T'[v]$ . Ideally, we want this  
 227 to have many leaves, but no more than  $\delta n$ . We find that:

228 **Lemma 1.** *For a subtree  $T'[v]$  that is deleted and reinserted in SplitRoot (Algorithm 1),  $\epsilon n/(2(h -$   
 229  $1)) < n_{T'}(v) \leq \delta n$ .*

230 The upper bound simply comes from our stopping condition in the first nested while loop: we ensure  
 231  $n_{T'}(v) \leq \delta n$  before selecting it. The lower bound is slightly more complicated. Effectively, we start  
 232 by noting that  $\max(\delta_1, \delta_2) > \epsilon$ , because otherwise the stopping condition for the outer loop would  
 233 be met. Then, consider the total amount of “excess of large clusters”, or more precisely, the sum  
 234 over all deviations from  $n/h$  of clusters larger than  $n/h$  (note if all clusters were  $n/h$ , it would be  
 235 perfectly balanced). This total excess must be matched in the “deficiency of small clusters”, which  
 236 is the sum of deviations of clusters smaller than  $n/h$ . Therefore, since there are at least  $h$  small or  
 237  $h$  large clusters, the largest deviation must be at most  $h$  times the smallest deviation, according to  
 238 our accounting scheme. This allows us to bound  $\delta \geq \epsilon/(h - 1)$ . The tree that is inserted and deleted  
 239 must have at least half this many leaves, since it is the larger child of a node with over  $\delta n$  leaves in its  
 240 subtree. This gives our lower bound, showing we move at least a significant number of vertices each  
 241 step.

242 Next, we want to show the relative balance. Along with the analysis, we also get the runtime, which  
 243 turns out to be near linear, assuming  $h \ll n$ .

**Lemma 2.** SplitRoot (Algorithm 1) yields a hierarchy whose root is  $\epsilon$ -relatively balanced with  $h$  children. In addition, it requires  $O(nh)$  time to halt.

To see why this is true, it's pretty obvious the root has  $h$  children, as this is set at the beginning and never changes. The runtime comes from our aforementioned accounting scheme: the total excess and deficiency is reduced by the number of leaves in the subtree we move at each step, which we showed in Lemma 1 is  $n\epsilon/(2(h-1))$  at least. This gives us a convergence time of  $O(h)$ , and each step can be bounded by  $O(n)$  time as we search for our insertion and deletion spots. Finally, the balance comes from the fact that our stopping condition is equivalent to the root being relatively balanced.

All that is left is to show the negative impact on the cost of edges that are separated by the algorithm. We bound it as follows:

**Lemma 3.** In SplitRoot (Algorithm 1), for all  $e \in E$  that is separated:

$$\text{cost}_{T'}(e) \leq n \cdot w(e) \leq 2(h-1) \cdot \text{cost}_T(e)/\epsilon$$

Lemma 1 tells us that moved subtrees are at least of size  $\epsilon n/(2(h-1))$ , which is a lower bound on the size of the smallest cluster containing any edge separated by the algorithm. This is because separated edges must have one endpoint in the deleted subtree and one outside, so their least common ancestor is an ancestor of the subtree. At worst, the final size of the smallest cluster containing such an edge is  $n$ , so the proportional increase is  $2(h-1)/\epsilon$  at worst.

### 3.2 Fair Tree Folding

Next, we discuss how to achieve fairness by using MakeFair, as seen in Algorithm 2. This is our final recursive algorithm which utilizes SplitRoot. Assume we are given some hierarchical clustering. We start by running SplitRoot, to balance the split at the root and give it  $h$  children. Next we use a folding process similar to that of Knittel et al. [2023], but we use our shallow tree fold operator.

More specifically, we first sort the children of the root by the proportional representation of the first color (say, red). Then, we do a shallow fold across various  $k$ -sized sets, defined as follows: according to our ordering over the children, partition the vertices into  $k$  contiguous chunks starting from the first vertex. For each  $i \in [h/k]$ , we find the  $i$ th vertex in each chunk and fold them together. Notice that this is a  $k$ -wise fold since there are  $k$  chunks, and we end up with  $h/k$  vertices. This is repeated on each color. After this, we simply recurse on the children. If a child is too small to be balanced by SplitRoot, then we stop and give it a trivial topology (a root with many leaf-children).

This completes our algorithm description. We now evaluate its runtime, degree of fairness, and approximation factor. To start, we show the degree of fairness achieved at the top level of the hierarchy.

**Lemma 4.** MakeFair (Algorithm 2) yields a hierarchy such that all depth 1 vertices satisfy fairness under  $\alpha_i \leq \frac{\lambda_i}{n} \cdot \frac{1-\epsilon}{(1+\epsilon)^2} \left(1 - \frac{k(1+\epsilon)}{c_i h}\right)$  and  $\beta_i \geq \frac{\lambda_i}{n} \cdot \frac{1+\epsilon}{(1-\epsilon)^2} \left(1 + \frac{1-\epsilon}{c_i k}\right)$ , where  $\lambda_i = c_i n$ .

This proof is quite in depth, and most details are deferred to the appendix. At a high level, we are showing that the folding process guarantees a level of fairness. The parts in our partition are ordered by the density of the color (say, red). Since each final vertex is made by folding across one vertex in each part, meaning that the vertices have a relatively wide spread in terms of their density of red points. This means that red vertices are distributed relatively well across our final subtrees. This guarantees a degree of balance.

The problem is that the degree of fairness still exhibits a compounding affect as we recurse. That is, since the first children are not perfectly balance, then in the next recursive step, the total data subset we are working on may now deviate from the true color proportions. This deviation is bounded by our result in Lemma 4, but it will increase proportionally at each step.

**Lemma 5.** In MakeFair (Algorithm 2), let  $\{\lambda_i\}_{i \in [\lambda]}$  be the proportion of each color and assume  $k^\lambda \ll h$ . At any recursive call, the proportion of any color is (where  $\lambda_i = 1/c_i$  for constant  $c_i$ ):

$$\lambda_i \left( \frac{1-\epsilon}{(1+\epsilon)^2} \left(1 - \frac{k(1+\epsilon)}{c_i h}\right) \right)^{O(\log(n/h))} \leq \lambda_i^j \leq \lambda_i \left( \frac{1+\epsilon}{(1-\epsilon)^2} \left(1 + \frac{1-\epsilon}{c_i k}\right) \right)^{O(\log(n/h))}$$

Also, the recursive depth is bounded above by  $O(\log(n/h))$ .

290 This fairly neatly comes from Lemma 4. Effectively, we increase the proportion of each color by  
 291 the same factor each recursive step. All that is left to do is bound the recursive depth. Notice we  
 292 start with  $n$  vertices. After splitting, our subtrees have size at most  $(1 + \epsilon)n/h$ . After one fold, this  
 293 is increased by a factor of  $k$ , and thus  $k^\lambda$  after all folds. Interestingly, this doesn't impact the final  
 294 result significantly; it's fairly similar to turning an  $n$ -sized tree into an  $n/h$ -sized tree, giving an  
 295  $O(\log(n/h))$  recursive depth. This will be sufficient to show our fairness.

---

**Algorithm 2** MakeFair

---

**Input:** A hierarchy tree  $T$  of size  $n \geq 1/2\epsilon$  over a graph  $G = (V, E, w)$  with vertices given one of  
 $\lambda$  colors, and parameters  $h \in [n]$ ,  $k \in [h/(\lambda - 1)]$ , and  $\epsilon \in (0, \min(1/6, 1/h))$ .

**Output:** A fair hierarchical clustering  $T'$ .

```

1:  $T' = \text{SplitRoot}(T, h, \epsilon)$ 
2:  $h' \leftarrow h$ 
3: for each color  $\ell \in [\lambda]$  do
4:   Order  $\{v_i\}_{i \in [h']}$  = children( $\text{root}(T')$ ) decreasing by  $\frac{\ell(\text{leaves}(v_i))}{n_{T'}(v_i)}$ 
5:   For all  $i \in [k]$ ,  $T' \leftarrow T'.\text{shallow\_fold}(\{T'[v_{i+(j-1)k}] : j \in [h'/k]\})$ 
6:    $h' \leftarrow h'/k$ 
7: end for
8: for each child  $v_i$  of  $\text{root}(T')$  do
9:   if  $n \geq \max(1/2\epsilon, h)$  then
10:    Replace  $T'[v_i] \leftarrow \text{MakeFair}(T'[v_i], h, k, \epsilon)$ 
11:   else
12:    Replace  $T'[v_i]$  with a tree of root  $v_i$ , leaves  $\text{leaves}(T'[v_i])$ , and depth 1.
13:   end if
14: end for

```

---

296 Next, we evaluate the cost incurred at each stage in the hierarchy.

297 **Lemma 6.** *In MakeFair (Algorithm 2), for all  $e \in E$  that is separated before the recursive call:*

$$\text{cost}_{T'}(e) \leq O\left(\frac{2(h-1)}{\epsilon} + \frac{1+\epsilon}{1-\epsilon}k^\lambda\right) \text{cost}_T(e)$$

298 As discussed before, the final cluster size should be  $(1 + \epsilon)nk^\lambda/h$ . Any separated edge must have a  
 299 starting cluster size of at least  $(1 - \epsilon)n/h$ , as this is the size of the smallest cluster involved in tree  
 300 folding. From this, it is simple to compute the proportional cost increase of a single recursive level.  
 301 We must also account for the cost increase from the initial splitting, from Lemma 3.

302 Another nice property of our method is that whenever an edge is separated, its endpoints' least  
 303 common ancestor will no longer be involved in any further recursive step. This tells us:

304 **Lemma 7.** *In MakeFair (Algorithm 2), any edge  $e \in E$  is separated at only one level of recursion.*

305 Putting these two together pretty directly gives us our cost approximation.

306 **Lemma 8.** *In MakeFair (Algorithm 2),  $\text{cost}(T') \leq O\left(\frac{2(h-1)}{\epsilon} + \frac{1+\epsilon}{1-\epsilon}k^\lambda\right) \text{cost}(T)$ .*

307 Finally, Theorem 1 comes directly from Lemmas 6 and 8.

## 308 4 Simulations

309 This section validates the theoretical guarantees of Algorithm 2. Specifically, we demonstrate that  
 310 modifying an unfair hierarchical clustering using the presented procedure yields a fair hierarchy that  
 311 incurs only a modest increase in cost.

312 **Datasets.** We use two data sets, *Census* and *Bank*, from the UCI data repository Dua and Graff  
 313 [2017]. Within each, we subsample only the features with numerical values. To compute the *cost* of a  
 314 hierarchical clustering we set the similarity to be  $w(i, j) = \frac{1}{1+d(i, j)}$  where  $d(i, j)$  is the Euclidean  
 315 distance between points  $i$  and  $j$ . We color data based on binary (represented as blue and red) protected  
 316 features: *race* for *Census* and *marital status* for *Bank* (both in line with the prior work of Ahmadian  
 317 et al. [2020]). As a result, *Census* has a blue to red ratio of 1:7 while *Bank* has 1:3. We then subsample  
 318 each color in each data set such that we retain (approximately) the data's original balance. We use  
 319 samples of size 512 for the balance experiments, and vary the sample sizes when assessing cost.



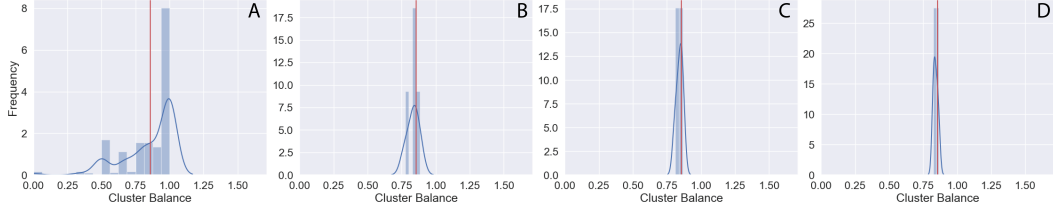

Figure 3: Histogram of cluster balances after tree manipulation by Algorithm 2 on a subsample from the *Census* dataset of size  $n = 512$ . The four panels depict: (A) cluster balances after applying the (unfair) average-linkage algorithm, (B) the resultant cluster balances after running Algorithm 2 with parameters  $(c, h, k, \varepsilon) = (8, 4, 2, 1/c \cdot \log_2 n)$ , (C) cluster balances after tuning  $c = 4$ , (D) cluster balances after further tuning  $c = 2$ . The vertical red line on each plot indicates the balance of the dataset itself.

For each experiment we conduct 10 independent replications (with different random seeds for the subsampling), and report the average results. We vary the parameters  $(c, h, k, \varepsilon)$  to experimentally assess their theoretical impact on the approximate guarantees of Section 3. Due to space constraints, we here present only the results for the *Census* dataset and defer the complimentary results on *Bank* to the appendix.

**Implementation.** The Python code for the following experiments are available in the Supplementary Material. We start by running average-linkage, a popular hierarchical clustering algorithm. We then apply Algorithm 2 to modify this structure and induce a *fair* hierarchical clustering that exhibits a mild increase in the cost objective.

**Metrics.** In our results we track the approximate cost objective increase as follows: Let  $G$  be our given graph,  $T$  be average-linkage’s output, and  $T'$  be Algorithm 2’s output. We then measure the ratio  $\text{RATIO}_{\text{cost}} = \text{cost}_G(T')/\text{cost}_G(T)$ . We additionally quantify the fairness that results from application of our algorithm by reporting the balances of each cluster in the final hierarchical clustering, where true fairness would match the color proportions of the underlying dataset.

**Results.** We first demonstrate how our algorithm adapts an unfair hierarchy into one that achieves fair representation of the protected attributes as desired in the original problem formulation.

In Figure 3, we depict the cluster balances of an *unfair* hierarchical clustering algorithm, namely “average-linkage”, and subsequently demonstrate that our algorithm effectively concentrates all clusters around the underlying data balance. In particular, we first apply the algorithm and then show how we the balance is further refined by tuning the parameters. The application of Algorithm 2 dramatically improves the representation of the protected attributes in the final clustering and, as such, firmly resolves the problem of achieving fairness.

While reaching this fair partitioning of the data is the overall goal, we further demonstrate that, in modifying the unfair clustering, we only increase the cost approximation by a modest amount. Figure 4 illustrates the change in relative cost as we increase the sample size  $n$ , the primary influence on our theoretical cost guarantees of Section 3. Specifically, we vary  $n$  in  $\{128, 256, 512, 1024, 2048\}$  and compute 10 replications (on different random seeds) of the fair hierarchical clustering procedure. Figure 4 depicts the mean relative cost of these replications with standard error bars. Notably, we see that the cost does increase with  $n$  as expected, but the increase relative to the unfair cost obtain by average linkage is only by a small multiplicative factor.

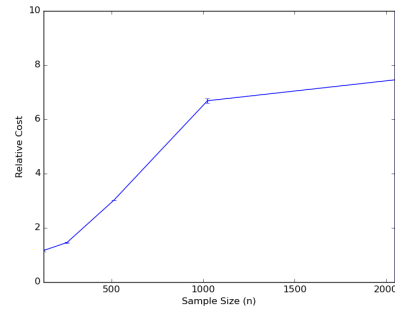

Figure 4: Relative cost of the fair hierarchical clustering resulting from Algorithm 2 compared to the unfair clustering as a function of the sample size  $n$ .

As demonstrated through this experimentation, the simplistic procedure of Algorithm 2 not only ensures the desired fairness properties absent in conventional (unfair) clustering algorithms but accomplishes this feat with a negligible rise in the overall cost. These results further highlight the immense value of our work.

## References

- Sara Ahmadian, Alessandro Epasto, Ravi Kumar, and Mohammad Mahdian. Clustering without over-representation. In *KDD*, pages 267–275, 2019.
- Sara Ahmadian, Alessandro Epasto, Marina Knittel, Ravi Kumar, Mohammad Mahdian, Benjamin Moseley, Philip Pham, Sergei Vassilvitskii, and Yuyan Wang. Fair hierarchical clustering. In Hugo Larochelle, Marc Aurelio Ranzato, Raia Hadsell, Maria-Florina Balcan, and Hsuan-Tien Lin, editors, *Advances in Neural Information Processing Systems 33: Annual Conference on Neural Information Processing Systems 2020, NeurIPS 2020, December 6-12, 2020, virtual*, 2020.
- Julia Angwin, Jeff Larson, Surya Mattu, and Lauren Kirchner. Machine bias: There’s software used across the country to predict future criminals. and it’s biased against blacks. 2016.
- Solon Barocas, Moritz Hardt, and Arvind Narayanan. *Fairness and Machine Learning*. [www.fairmlbook.org](http://www.fairmlbook.org), 2019.
- Omer Ben-Porat, Fedor Sandomirskiy, and Moshe Tennenholtz. Protecting the protected group: Circumventing harmful fairness. In *Thirty-Fifth AAAI Conference on Artificial Intelligence*, pages 5176–5184. AAAI Press, 2021.
- Suman Kalyan Bera, Deeparnab Chakrabarty, Nicolas Flores, and Maryam Negahbani. Fair algorithms for clustering. In *NeurIPS*, pages 4955–4966, 2019.
- Ioana O Bercea, Martin Groß, Samir Khuller, Aounon Kumar, Clemens Rösner, Daniel R Schmidt, and Melanie Schmidt. On the cost of essentially fair clusterings. In *APPROX-RANDOM*, pages 18:1–18:22, 2019.
- M. Bogen and A. Rieke. Help wanted: An examination of hiring algorithms, equity, and bias. Technical report, Upturn, 2018.
- Brian Brubach, Darshan Chakrabarti, John P. Dickerson, Samir Khuller, Aravind Srinivasan, and Leonidas Tsepenekas. A pairwise fair and community-preserving approach to k-center clustering. In *Proceedings of the 37th International Conference on Machine Learning*, volume 119 of *Proceedings of Machine Learning Research*, pages 1178–1189. PMLR, 2020.
- Moses Charikar and Vaggos Chatziafratis. Approximate hierarchical clustering via sparsest cut and spreading metrics. In *SODA*, pages 841–854, 2017.
- Junjie Chen, Shu Zhang, Xiaoting He, Qingwei Lin, Hongyu Zhang, Dan Hao, Yu Kang, Feng Gao, Zhangwei Xu, Yingnong Dang, and Dongmei Zhang. How incidental are the incidents? characterizing and prioritizing incidents for large-scale online service systems. Association for Computing Machinery, 2021a. ISBN 9781450367684.
- Junjie Chen, Shu Zhang, Xiaoting He, Qingwei Lin, Hongyu Zhang, Dan Hao, Yu Kang, Feng Gao, Zhangwei Xu, Yingnong Dang, and Dongmei Zhang. How incidental are the incidents? characterizing and prioritizing incidents for large-scale online service systems. Association for Computing Machinery, 2021b. ISBN 9781450367684.
- Yujun Chen, Xian Yang, Hang Dong, Xiaoting He, Hongyu Zhang, Qingwei Lin, Junjie Chen, Pu Zhao, Yu Kang, Feng Gao, Zhangwei Xu, and Dongmei Zhang. Identifying linked incidents in large-scale online service systems. Association for Computing Machinery, 2020. ISBN 9781450370431.
- Flavio Chierichetti, Ravi Kumar, Silvio Lattanzi, and Sergei Vassilvitskii. Fair clustering through fairlets. In *NIPS*, pages 5029–5037, 2017.
- Vincent Cohen-Addad, Varun Kanade, Frederik Mallmann-Trenn, and Claire Mathieu. Hierarchical clustering: Objective functions and algorithms. In *SODA*, pages 378–397, 2018.
- Sanjoy Dasgupta. A cost function for similarity-based hierarchical clustering. In *STOC*, pages 118–127, 2016.
- Dheeru Dua and Casey Graff. UCI machine learning repository, 2017. URL <http://archive.ics.uci.edu/ml>.

- 409 Cynthia Dwork, Moritz Hardt, Toniann Pitassi, Omer Reingold, and Richard S. Zemel. Fairness  
410 through awareness. In Shafi Goldwasser, editor, *Innovations in Theoretical Computer Science*  
411 *2012, Cambridge, MA, USA, January 8-10, 2012*, pages 214–226. ACM, 2012.
- 412 Marina Knittel, Max Springer, John P. Dickerson, and MohammadTaghi Hajiaghayi. Generalized  
413 reductions: Making any hierarchical clustering fair and balanced with low cost, 2023.
- 414 Alexander Kraskov, Harald Stögbauer, Ralph G. Andrzejak, and Peter Grassberger. Hierarchical  
415 clustering using mutual information. *CoRR*, q-bio.QM/0311037, 2003.
- 416 Heidi Ledford. Millions of black people affected by racial bias in healthcare algorithms. *Nature*,  
417 2019.
- 418 Benjamin Moseley and Joshua Wang. Approximation bounds for hierarchical clustering: Average  
419 linkage, bisecting  $k$ -means, and local search. In *NIPS*, pages 3094–3103, 2017.
- 420 Rohan Ramanath, Monojit Choudhury, and Kalika Bali. Entailment: An effective metric for compar-  
421 ing and evaluating hierarchical and non-hierarchical annotation schemes. In Stefanie Dipper, Maria  
422 Liakata, and Antonio Pareja-Lora, editors, *Proceedings of the 7th Linguistic Annotation Workshop*  
423 *and Interoperability with Discourse, LAW-ID@ACL 2013, August 8-9, 2013, Sofia, Bulgaria*, pages  
424 42–50. The Association for Computer Linguistics, 2013.
- 425 AN Selvan, LM Cole, L Spackman, S Naylor, and Wright C. Hierarchical cluster analysis to aid  
426 diagnostic image data visualization of ms and other medical imaging modalities. In *Molecular*  
427 *Biotechnology*, 2005.
- 428 Latanya Sweeney. Discrimination in online ad delivery. *ACM Queue*, 2013.

## 429 A Limitations

430 Fair machine learning strives to combat the limitations of vanilla machine learning by providing  
 431 a means for bias mitigation for any desired quantifiable bias. However, fair research itself has its  
 432 own limitations. First, “fairness” can be defined in a number of ways. For instance, Dwork et al.  
 433 [2012] explores notions of fairness in classification problems, proposing a type of “individual fairness”  
 434 which guarantees that similar individuals are treated similarly. This has been extended to clustering  
 435 by only the work of Brubach et al. [2020]. Clustering has been predominantly viewed through the  
 436 lens of “group fairness” which guarantees that different protected classes receive similar, proportional  
 437 treatment. This was first proposed in clustering by Chierichetti et al. [2017] and expanded upon in  
 438 many further works [Ahmadian et al., 2019, Bera et al., 2019, Bercea et al., 2019], including previous  
 439 fair hierarchical clustering work [Ahmadian et al., 2020, Knittel et al., 2023] and this work. Not only  
 440 is it inherently difficult to account for both of these simultaneously, in some sense these two notions  
 441 are at odds: if we treat similar individuals similarly, it becomes much harder to impose a diverse  
 442 range of treatments to individuals in each group, as they often are quite similar themselves. This  
 443 illustrates the necessity of applying fair algorithms on a case by case basis, carefully considering  
 444 what fair effect is most desirable.

445 Second, bias mitigation through fair algorithmic techniques has been shown to cause harm in at least  
 446 one application [Ben-Porat et al., 2021]. Thus, all fair machine learning techniques, including ours,  
 447 should be used with great caution and consideration of all downstream effects. We defer the reader to  
 448 Barocas et al. [2019] as well as the Fair Clustering Tutorial [AAAI 2023] for further perspectives on  
 449 fair machine learning and its limitations.

450 The main results of this paper are theoretical guarantees on algorithmic performance. Naturally, this  
 451 provides additional limitations, predominantly in that the guarantees only hold under the assumptions  
 452 clearly stated in this paper. For instance, our main algorithm requires that each color represents a  
 453 constant fraction of the total data. This assumption is quite realistic and can be found throughout fair  
 454 learning literature, but there are certain practical instances where our results may not be applicable.  
 455 In addition, since our proofs only consider worst-case analysis, we do not know much about the  
 456 average-case guarantees of our algorithms (other than they are strictly better than the worst case).  
 457 We account for this through empirical evaluation, though this is inherently limited as tested data sets  
 458 cannot represent all potential applications.

459 Finally, our work focuses on the cost objective function. While cost is highly regarded by the  
 460 hierarchical clustering community [Dasgupta, 2016], it may not be an appropriate metric for all  
 461 applications. Moreover, it is sometimes viewed as impractical in that it is quite difficult to provide  
 462 worst-case guarantees for [Charikar and Chatziafratis, 2017]. Future work might consider evaluating  
 463 our algorithms using other objectives such as revenue Moseley and Wang [2017] or value Cohen-  
 464 Addad et al. [2018] to see how they perform.

## 465 B Proofs

466 This section contains the formal proofs for all of our lemmas and theorems.

467 *Proof of Lemma 1.* We start by comparing  $\delta$  and  $\epsilon$  at some iteration. Consider  $v_{min}$  and  $v_{max}$  at  
 468 that iteration. Without loss of generality, say  $n/h - n_{T'}(v_{min})/n \leq n_{T'}(v_{max})/n - n/h$ , implying  
 469  $\delta = \delta_1 = n/h - n_{T'}(v_{min})/n$ . Additionally, since the while loop executed, we know either  
 470  $n_{T'}(v_{max}) = n(1/h + \delta_2) > n(1/h + \epsilon)$  or  $n_{T'}(v_{min}) = n(1/h - \delta_1) < n(1/h - \epsilon)$ . With a little  
 471 algebraic simplification, this gives us that  $\delta_1 > \epsilon$  or  $\delta_2 > \epsilon$ . Since we said  $\delta = \delta_1$ ,  $\delta_1$  must be the  
 472 smaller, so we can safely assume  $\delta_2 > \epsilon$ .

473 Now, we know conservatively that  $\delta_2 < n_{T'}(v_{max})/n \leq 1$ . Since  $n_{T'}(v_{min})/n$  has the largest  
 474 deviation from  $1/h$  of all of  $v' \in \text{children}(\text{root}(T'))$  with  $n_{T'}(v') \leq n/h$ , this means that  $1/h -$   
 475  $n_{T'}(v')/n \leq \delta_1$  for all  $v' \in \text{children}(\text{root}(T'))$ , in other words,  $n_{T'}(v') \geq n(1/h - \delta_1)$ . Since  
 476  $\text{children}(\text{root}(T'))$  form a clustering of the data,  $\sum_{v' \in \text{children}(\text{root}(T'))} n_{T'}(v') = n$ . In addition,  
 477 because of our bound:

$$\begin{aligned}
\sum_{v' \in \text{children}(\text{root}(T'))} n_{T'}(v') &= \sum_{v' \in \text{children}(\text{root}(T')) \setminus v_{\max}} n_{T'}(v') + n_{T'}(v_{\max}) \\
&\geq (h-1) \cdot n(1/h - \delta_1) + n/h + n\delta_2 \\
&= n - n(h-1)\delta_1 + n\delta_2
\end{aligned}$$

Recall our original value is  $n$ . Thus  $n \geq n - n(h-1)\delta_1 + n\delta_2$ . Finally, we get  $\delta_1 \geq \delta_2/(h-1)$ . This means  $\delta \geq \epsilon/(h-1)$ . A similar math can show the same result if  $\delta_2$  is the smaller value. For an upper bound, we have that since the smallest cluster size is 0,  $\delta \leq \delta_1 \leq 1/h$ .

Let  $p$  be the parent of  $v$ . By the halting condition of the while loop on Line 13, we know  $n_{T'}(p) > \delta n$ , otherwise the loop would have halted earlier. Since  $v$  is the right child of  $p$ , it is the larger of two children, implying  $n_{T'}(v) \geq n_{T'}(p)/2 > \delta n/2$ , which is just at least  $\epsilon/(2(h-1))$  by our previous math. Finally, since the loop did halt on  $v$ , we know  $n_{T'}(v) \leq \delta n$ .  $\square$

*Proof of Lemma 2.* First off, clearly the root has  $h$  children, because we give it  $h$  children and never change this.

For the runtime, notice that we always decrease the number of leaves of the child with the max number of leaves. Let  $n_{\text{tot}} = \sum_{v' \in \text{children}: n_{T'}(v') > 1/h} n_{T'}(v') - n/h \leq n$ . Note that the number of vertices in this summation is only ever reduced, since we swap at most  $\delta n$  vertices from the largest to the smallest vertex, implying the smallest vertex will never exceed  $n/h$ . Since  $v_{\max}$  is necessarily involved in this sum (if not, then  $n_{T'}(v_{\max}) = 1/h$ , implying all children are of equal size, meaning the algorithm already halted), and  $n_{T'}(v_{\max})$  is reduced by at least  $\epsilon n/(2(h-1))$  each iteration by Lemma 1, we require at most  $2(h-1)$  iterations of the while loop before we halt. In each iteration, we traverse down two subtrees to delete and insert, which takes at most  $O(n)$  time each, for a total of  $O(nh)$  time to complete the algorithm.

Finally, assume for contradiction it is not  $\epsilon$ -relatively balanced with respect to  $h$  children. This means that in the output, either: 1) some vertex has under  $(1/h - \epsilon)n$  leaves in its subtree, or 2) some vertex has over  $(1/h + \epsilon)n$  leaves in its subtree. In the first case, this means  $n_{T'}(v_{\min}) < (1/h - \epsilon)n$ , implying the while loop will continue to execute, contradicting that this is the resulting output. A similar argument holds in the second case. Thus, the root is  $\epsilon$ -relatively balanced.  $\square$

*Proof of Lemma 3.* Consider an edge  $e = (x, y)$  that is separated when we delete and insert. This can only happen if, without loss of generality,  $x$  is in the deleted/inserted component and  $y$  is not. Recall  $v$  whose subtree is deleted and reinserted. By Lemma 1,  $n_T(v) > \epsilon n/(2(h-1))$ .

Since  $x$  is a descendant of  $v$  and  $y$  is not, their lowest common ancestor  $v'$  must be an ancestor of  $v$ . Thus  $n_T(v') > n_T(v) > \epsilon n/(2(h-1))$ . Thus,  $\text{cost}_T(e) = n_T(v') \cdot w(e) \geq \epsilon n \cdot w(e)/(2(h-1))$ . In the end, the maximum cost is  $\text{cost}_{T'}(e) \leq n \cdot w(e)$ , therefore  $\text{cost}_{T'}(e) \leq \frac{2(h-1)}{\epsilon}$ . This concludes the proof.  $\square$

*Proof of Lemma 4.* For simplicity, assume  $k^\lambda | h$ . Our algorithm first orders the depth 1 vertices decreasing by the fractional representation of the first color, say red. It then partitions it into parts of size  $h/k$  according to this order and folds all vertices of the same index in their part together. That is,  $k$  clusters are merged. We begin with  $h$  vertices, but after the  $(x-1)$ th fold, we only have  $h/k^x$  remaining. Let  $x$  be the iteration we are at in the folding process.

Let  $f(i, j)$  denote the  $i$ th index in the  $j$ th partition of  $\mathcal{V}$ , i.e.,  $f(i, j) = jh/k + i$ . Then for every  $i \in [h/k]$ , we create a new vertex  $u_i$  by folding  $v_{f(i, j)}$  together for all  $j \in k$ . Let  $r_i$  denote the number of red vertices in  $u_i$ . For any  $i$ :

$$r_i/n_{T'}(u_i) = \frac{1}{n_{T'}(u_i)} \sum_{j \in [k]} \text{red}(v_{f(i, j)}) \leq \frac{1}{n_{T'}(u_i)} \text{red}(v_{f(1, 1)}) + \frac{1}{n_{T'}(u_i)} \sum_{j \in \{2, \dots, k\}} \text{red}(v_{f(i, j)})$$

517 Note that if we perfectly balanced all cluster sizes at  $n/h$ , then  $\text{red}(v_{f(1,1)}) \leq n/h = n_{T'}(u_i)/k$   
 518 would hold. However,  $v_{f(1,1)}$  may be a factor of at most  $1 + \epsilon$  larger and  $n_{T'}(u_i)$  may be a factor of  
 519 at least  $1 - \epsilon$  smaller. This means that our first term simplifies to  $\frac{1+\epsilon}{k(1-\epsilon)}$ .

520 For our second term, we note that  $\text{red}(v_{f(i,j)})/n_T(v_{f(i,j)}) \leq \text{red}(v_{f(i,j-1)})/n_T(v_{f(i,j-1)})$ . Since  
 521 we have relative balance, all  $n_T$  values are within a factor of  $\frac{1+\epsilon}{1-\epsilon}$  of each other. This means  
 522  $\text{red}(v_{f(i,j)}) \leq \frac{1+\epsilon}{1-\epsilon} \text{red}(v_{f(i',j-1)})$  for all  $i' \in [h/k]$ . We can also take this as an average, as  
 523 in,  $\text{red}(v_{f(i,j)}) \leq \frac{k(1+\epsilon)}{h(1-\epsilon)} \sum_{i' \in [h/k]} \text{red}(v_{f(i',j-1)})$ . Conservatively, this results in the summation  
 524  $\sum_{j \in \{2, \dots, h/k\}} \sum_{i' \in [k]} \text{red}(v_{f(i',j-1)})$ . Here, we are practically counting (actually slightly undercount-  
 525 ing) the total number of reds, which we call  $R$ . Plugging all of this in:

$$r_i/n_{T'}(u_i) \leq \frac{1+\epsilon}{k(1-\epsilon)} + \frac{(1+\epsilon)}{n(1-\epsilon)^2} R = \frac{R}{n} \cdot \frac{1+\epsilon}{(1-\epsilon)^2} \left(1 + \frac{1-\epsilon}{c_R k}\right)$$

526 Where since  $R = O(n)$ , we let  $c_R$  be the constant satisfying  $R \geq c_R n$ .

527 All that is left is to consider the lower bound. We can apply similar simplifications as before, but now  
 528 we reverse the bound.

$$r_i/n_{T'}(u_i) = \frac{1}{n_{T'}(u_i)} \sum_{j \in [k]} \text{red}(v_{f(i,j)}) \geq \frac{1-\epsilon}{nh(1+\epsilon)^2} \sum_{j \in [k-1]} \sum_{i' \in [k]} \text{red}(v_{f(i',j+1)})$$

529 Again, we are undercounting  $R$  in the nested summations, though it is more problematic in the lower  
 530 bound. Our missing terms are  $\sum_{i' \in [k]} \text{red}(v_{f(i',1)})$ . We can only bound this by the total size of the  
 531 first partition, which is at most  $(1+\epsilon)kn/h$ .

$$r_i/n_{T'}(u_i) \geq \frac{1-\epsilon}{n(1+\epsilon)^2} (R - (1+\epsilon)kn/h) = \frac{R}{n} \cdot \frac{1-\epsilon}{(1+\epsilon)^2} \left(1 - \frac{k(1+\epsilon)}{c_R h}\right)$$

532 **Marina: still need to account for the latter colors!**

533

□

534 *Proof of Lemma 5.* We prove this inductively, saying at the  $j$ th level of recursion,  
 535  $\lambda_i \left( \frac{1-\epsilon}{(1+\epsilon)^2} \left(1 - \frac{k(1+\epsilon)}{c_i h}\right) \right)^j \leq \lambda_i^j \leq \lambda_i \left( \frac{1+\epsilon}{(1-\epsilon)^2} \left(1 + \frac{1-\epsilon}{c_i k}\right) \right)^j$ . This is obviously true in the  
 536 base call to the algorithm, since  $\lambda_i^j = \lambda_i$ . Assume this holds for level  $j$ .

537 In level  $j+1$ , any instance of the problem is really a subproblem on the hierarchy induced on a  
 538 cluster from the  $j$ th level of recursion. In that level of recursion, the number of vertices of color  $i$ , our  
 539 induction shows that  $\lambda_i \left( \frac{1-\epsilon}{(1+\epsilon)^2} \left(1 - \frac{k(1+\epsilon)}{c_i h}\right) \right)^j \leq \lambda_i^j \leq \lambda_i \left( \frac{1+\epsilon}{(1-\epsilon)^2} \left(1 + \frac{1-\epsilon}{c_i k}\right) \right)^j$ . By Lemma 4,  
 540 we can bound how much worse this gets by an additional multiplicative factor, yielding the desired  
 541 inductive proof.

542 All that is left is to show the depth. At any recursive level, we begin with clusters of size of at most  
 543  $(1+\epsilon)n/h$  after balancing. We fold  $k$  vertices together at most  $\lambda$  times, for a total size of at most  
 544  $(1+\epsilon)nk^\lambda/h$ . This means after the  $j$ th iteration, we have  $n((1+\epsilon)k^\lambda/h)^j$  vertices left. Once we  
 545 have only  $h$  vertices left, we will certainly stop. With a little simple arithmetic, we find this occurs  
 546 when  $j \leq \frac{\log(n/h)}{\log(h/((1+\epsilon)k^\lambda))} = O(\log(n/h))$  as long as  $h \geq (1+\epsilon)k^\lambda$ . This is the maximum number  
 547 of iterations we require. Plugging this into our inductive finding gives the complete proof. □

548 *Proof of Lemma 6.* We already know that an edge  $e$  may be separated by SplitRoot, and if so, it  
 549 incurs a cost of  $2(h-1)/\epsilon$ . If this occurs, note that we already consider the worst case scenario:  
 550 when  $\text{cost}_{T'}(e) = n \cdot w(e)$ . Therefore, if an edge is involved in separation in MakeFair, the cost  
 551 increase estimate cannot get worse.

552 We now consider an edge  $e$  that is separated in MakeFair. It is not too hard to see that the cluster  
 553 containing  $e$  must have been one of the depth 1 clusters, because otherwise  $e$  would not be affected by  
 554 the algorithm. Therefore,  $n_T(e) \geq (1 - \epsilon)n/h$  (again, assuming it was not affected by the balancing).  
 555 In the end, the max cluster size  $e$  belongs to will be  $(1 + \epsilon)nk^\lambda/h$ , thus incurring a total cost increase  
 556 of  $\frac{1+\epsilon}{1-\epsilon}k^\lambda$ .  $\square$

557 *Proof of Lemma 7.* This is not too hard to see. If an edge  $e$  is separated in a recursive level, that  
 558 means the new worst-case ancestor is either the root at that level of recursion or the next. In the  
 559 former case,  $e$  is not involved in any further trees in the recursive process. In the latter case, it is  
 560 contained in the root of one more recursive process. As this is already the most costly way to cluster  
 561  $e$  in the subproblem, it cannot be further separated.  $\square$

562 *Proof of Lemma 8.* This simply follows from Lemmas 6 and 7. The former shows the cost of  
 563 separating an edge at a recursive level, and the latter says that this happens at most once to each  
 564 edge.  $\square$

565 *Proof of Theorem 1.* Relative balance holds because we create relative balance in SplitRoot. While  
 566 we do fold these nodes together, merging nodes does not break relative balance. Our approximation  
 567 factor is proved in Lemma 8. Lemma 5 gives us a bound on the proportion of each color in each  
 568 recursive level, which in effect also tells us the actual fairness of each cluster in the hierarchy (i.e., by  
 569 looking at the proportion of a certain color when we recurse on a cluster's subtree). This yields the  
 570 desired fairness guarantee.

571 Finally, we showed the runtime for SplitRoot is  $O(n'h)$  in Lemma 2, where  $n'$  is the current tree size.  
 572 In MakeFair, we require simple iteration and sorting to process the colors, and folding is a pretty  
 573 simple process. Thus the first for loop only requires  $O(n' \log n')$  time per execution for a total of  
 574  $O(\lambda n' \log n')$  time. At any recursive level, a node is involved in at most one recursive instance. This  
 575 means that the total time to execute a single recursive level is  $O(n(h + \lambda \log n))$ . Finally, Lemma 5  
 576 also tells us the recursive depth is bounded by  $O(\log(n/h)) = O(\log n)$ . Thus the total runtime is  
 577  $O(n \log n(h + \lambda \log n))$ .  $\square$

## 578 C Additional Experiments

579 We here demonstrate how our algorithm adapts an unfair hierarchy into one that achieves fair  
 580 representation of the protected attributes on the *Bank* dataset through a complimentary simulation to  
 581 that of Section ??

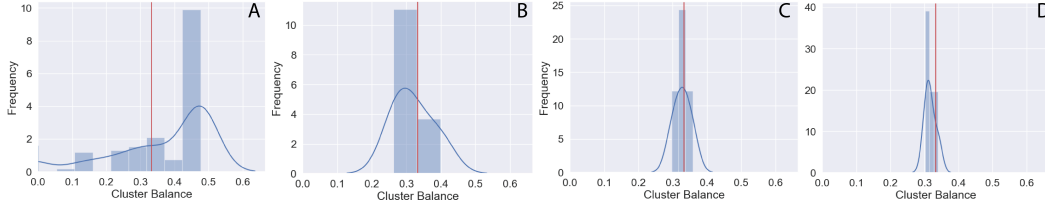

Figure 5: Histogram of cluster balances after tree manipulation by Algorithm 2 on a subsample from the *Bank* dataset of size  $n = 512$ . The four panels depict: **(A)** cluster balances after applying the (unfair) average-linkage algorithm, **(B)** the resultant cluster balances after running Algorithm 2 with parameters  $(c, h, k, \varepsilon) = (8, 4, 2, 1/c \cdot \log_2 n)$ , **(C)** cluster balances after tuning  $c = 4$ , **(D)** cluster balances after further tuning  $c = 2$ . The vertical red line on each plot indicates the balance of the dataset itself.
